# Supplementary material for: IL-33 enhances Jagged1 mediated NOTCH1 intracellular domain (NICD) deubiquitination and pathological angiogenesis in proliferative retinopathy
Source: PubMed Central journal article supplement (PMC9120174; doi:10.1038/s42003-022-03432-7), 2022-05-19
Supplement: 42003_2022_3432_MOESM3_ESM.pdf [file 42003_2022_3432_MOESM3_ESM.pdf]

## Description of Additional Supplementary Files

**File name:** Supplementary Data 1

**Description:** The statistical source data for all the graphs presented in figures.
